# Supplementary material for: A Prognostic Signature Constructed by CTHRC1 and LRFN4 in Stomach Adenocarcinoma
Source: Front Genet. 2021 Aug 26;12:646818. doi: 10.3389/fgene.2021.646818 (PMC8427509; doi:10.3389/fgene.2021.646818)
Supplement: Supplementary Table 2 — Significantly enriched signal pathway in patients with high-risk compared with patients with low-risk in GSE15459. [file Table_2.XLSX]

## Sheet: Sheet1
symbol	GSE118916（log2FC）	GSE118916（P-value）	GSE13861（log2FC）	GSE13861（P-value）	GSE103236（log2FC）	GSE103236（P-value）	TCGA-STAD（log2FC）	TCGA-STAD（P-value）
TNFRSF11B	5.17303	8.87215e-06	-2.57866	6.71108e-06	-2.27034	3.66619e-05	3.39574	6.211e-11
IGF2BP3	4.94301	0.000106861	-1.03334	2.72922e-05	-3.33139	0.000404976	3.7075	3.051e-12
SNX10	4.73667	1.99873e-05	-1.74801	4.141e-07	-1.32826	0.00075039	2.12175	1.034e-15
HOXC9	4.55183	3.01761e-05	-1.51329	2.0762e-06	3.12615	2.38303e-06	4.85125	<2.2e-16
TPX2	4.42968	7.17876e-06	-1.69519	6.27888e-07	1.05755	0.000601808	2.5746	<2.2e-16
ESM1	4.34354	4.78554e-05	2.89131	2.58495e-10	-1.67954	0.000292773	5.06322	<2.2e-16
SULF1	4.12269	0.000656287	-1.51075	8.01848e-07	-2.21757	0.000539871	2.78456	2.727e-13
CDH3	3.89946	2.54502e-05	1.08276	5.85805e-05	1.61199	0.000129832	2.28338	1.205e-11
MMP11	3.6649	0.000261287	-3.39272	1.47187e-06	-2.01164	9.38852e-05	4.56849	<2.2e-16
SPP1	3.61059	0.00128744	-1.002	1.71104e-06	2.44205	0.000309321	4.34197	6.703e-14
SPON2	3.56259	0.000347618	1.02007	8.06623e-07	1.48245	2.84907e-05	1.33239	5.161e-09
TTYH3	3.42308	0.00254597	1.3969	8.61902e-13	1.25102	3.29238e-05	1.92815	2.298e-15
ETV4	3.23218	0.00150448	1.35208	7.40859e-08	2.76416	2.27139e-05	3.05608	2.185e-15
LRFN4	3.21948	2.67944e-05	1.27956	1.8089e-08	2.17337	5.58612e-07	2.3604	<2.2e-16
SALL4	3.06001	0.00370759	1.48977	1.06647e-06	4.032	2.83928e-07	5.4004	<2.2e-16
COL5A2	3.05671	8.6652e-05	1.50612	3.0053e-07	1.45006	0.000418116	2.24636	3.308e-15
CLDN1	2.91272	0.00546552	2.71101	9.3809e-13	3.12615	5.69467e-05	2.3785	6.562e-13
ASPM	2.6973	0.000806784	1.1315	5.56038e-06	1.48934	0.00106831	2.43528	3.798e-16
KRT17	2.67188	0.00246076	2.25064	4.80579e-05	4.27588	0.000137932	2.43901	2.696e-08
ENC1	2.51737	0.00209588	1.09992	7.55199e-06	1.27824	0.00167049	2.29319	<2.2e-16
BGN	2.47826	0.000468228	1.41559	4.42057e-07	2.10547	5.77785e-06	2.90967	<2.2e-16
CTHRC1	2.46884	0.00539009	1.48931	0.000127909	3.17138	1.50946e-07	3.79656	<2.2e-16
TIMP1	2.35796	0.000715902	1.47518	1.23854e-12	1.99615	9.54035e-05	1.79817	5.47e-14
ECT2	2.31184	0.00440165	1.01324	6.89729e-06	1.68506	0.000262817	2.76646	<2.2e-16
APOC1	2.29401	0.000501221	1.41327	2.85986e-05	3.02291	0.000188928	2.77456	6.055e-13
DPT	2.23327	0.0064573	-1.15652	0.00594597	-3.34708	3.36217e-05	-3.59367	<2.2e-16
FNDC5	-2.05128	0.00972677	-1.57302	7.61329e-11	-2.55223	0.000413997	-1.929	2.607e-09
SYT4	-2.14168	0.00129517	-1.12357	2.76522e-19	-2.07651	0.000288476	0.259924	3.606e-07
GIF	-2.3745	0.00813688	-7.07422	1.6493e-29	-5.90218	0.00109223	-4.56935	0.001486
ATP4B	-2.6653	0.00444788	-4.15169	7.29745e-35	-6.84227	0.000514264	-4.95125	1.389e-05
SLC2A12	-2.68895	0.0058892	-1.54553	3.36578e-12	-2.22793	0.000903104	-1.14314	1.564e-09
CGNL1	-3.2416	0.000140313	-1.69519	3.18847e-08	-1.67794	0.000734483	-1.59716	1.338e-07
METTL7A	-3.35997	0.000468967	-1.66144	4.6712e-08	-1.67057	2.07051e-05	-1.26161	3.222e-14
APLP1	-3.4356	0.00351834	-1.13698	2.73897e-08	-1.47968	0.000660886	-0.663963	0.0006015
LIFR	-3.55279	0.000901753	-1.65604	1.11038e-11	-2.58239	0.000104521	-1.02565	6.093e-08
KCNJ13	-4.108	3.80926e-05	-1.74225	5.28116e-20	-2.28817	0.00152615	-1.80694	0.01789
ESRRG	-4.26228	0.000579904	-1.75926	7.02687e-31	-3.36757	7.89618e-05	-2.98086	1.344e-12
DRD5	-4.28356	3.26464e-05	-1.83059	3.64896e-17	-3.33825	0.000564216	1.40284	0.007455
SUCLG2	-4.64919	7.05509e-06	-1.10145	1.49582e-10	-1.00431	0.00137341	-0.421831	0.0002924
SH3GL2	-4.65468	3.05377e-07	-2.61687	3.93128e-21	-2.1674	0.00127399	-2.49326	1.285e-13
SIGLEC11	-4.67829	1.40329e-05	-1.77696	3.04608e-19	-2.51249	0.00122046	-2.32068	0.0001544
PLA2G1B	-4.95656	0.000225629	-1.14322	2.74496e-13	-1.79246	0.000769834	3.37934	0.003432
CCKBR	-5.78613	0.000234706	-2.66932	1.51518e-15	-3.84876	0.000146229	-2.72527	5.606e-09
ALDH6A1	-5.89126	0.000210385	-1.55438	1.68557e-11	-1.18223	0.000413103	-0.836907	9.907e-12
